# Supplementary material for: GSK3 is a negative regulator of the thermogenic program in brown adipocytes
Source: PubMed Central journal article supplement (PMC5823915; doi:10.1038/s41598-018-21795-y), 2018-02-22
Supplement: 41598_2018_21795_MOESM1_ESM.pdf [file 41598_2018_21795_MOESM1_ESM.pdf]

**GSK3 is a negative regulator of the thermogenic program in brown adipocytes**

Lasse K. Markussen, Sally Winther, Barton Wicksteed & Jacob B. Hansen

Supplementary Information Files

**Supplementary Figure 1: GSK3 is an adipocyte-selective Fgf21 regulator.**

**Supplementary Figure 2: Full-length immunoblots.**

**Supplementary Table 1: Inhibitors used for the kinase inhibitor screens.**

**Supplementary Table 2: Quantification of immunoblots.**

# Supplementary Figure 1

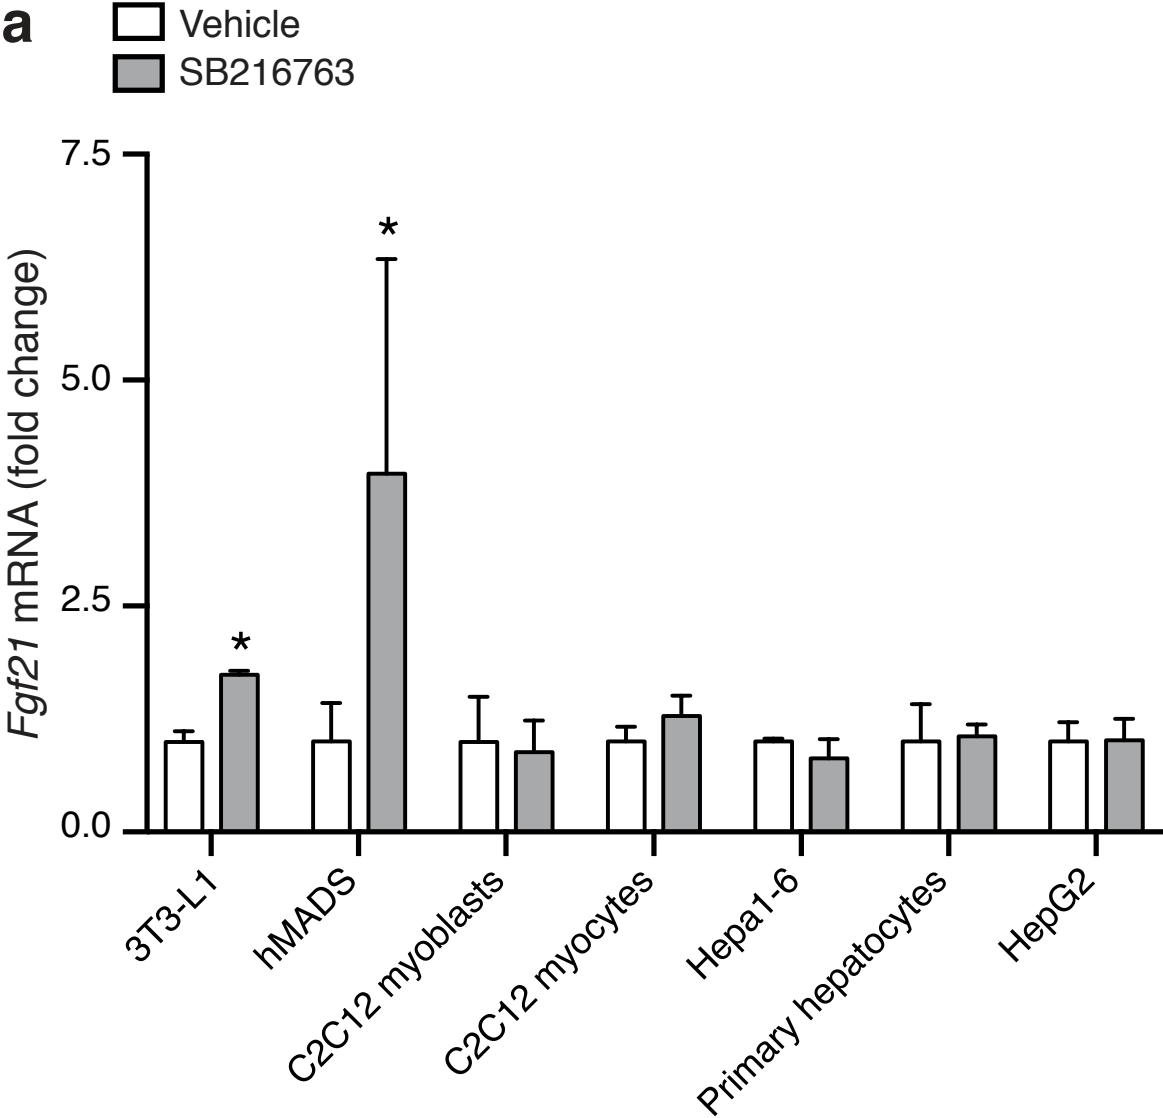

**Supplementary Figure 2: Full-length immunoblots.**

**Fig. 2d:**

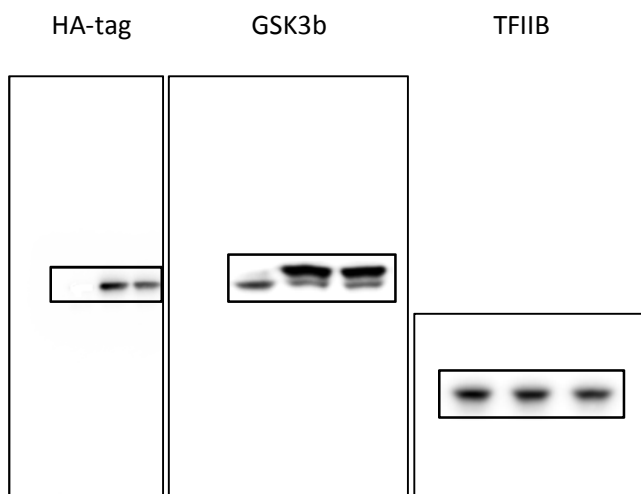

**Fig. 3b:**

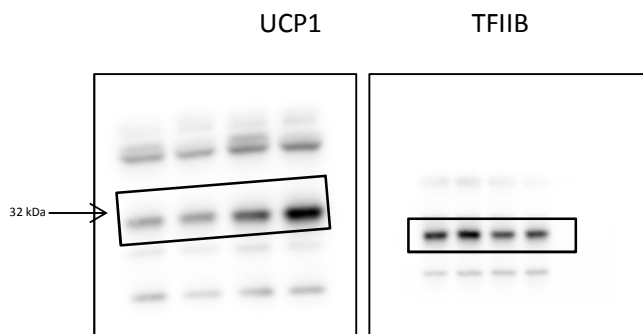

Fig. 3d:

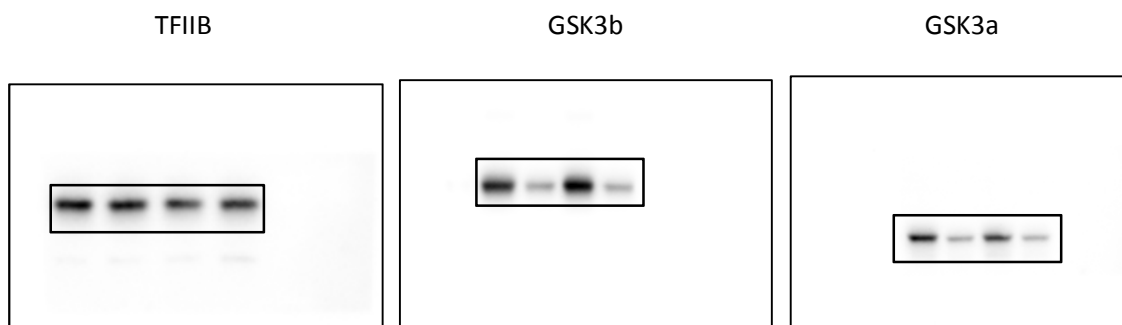

Fig. 4a:

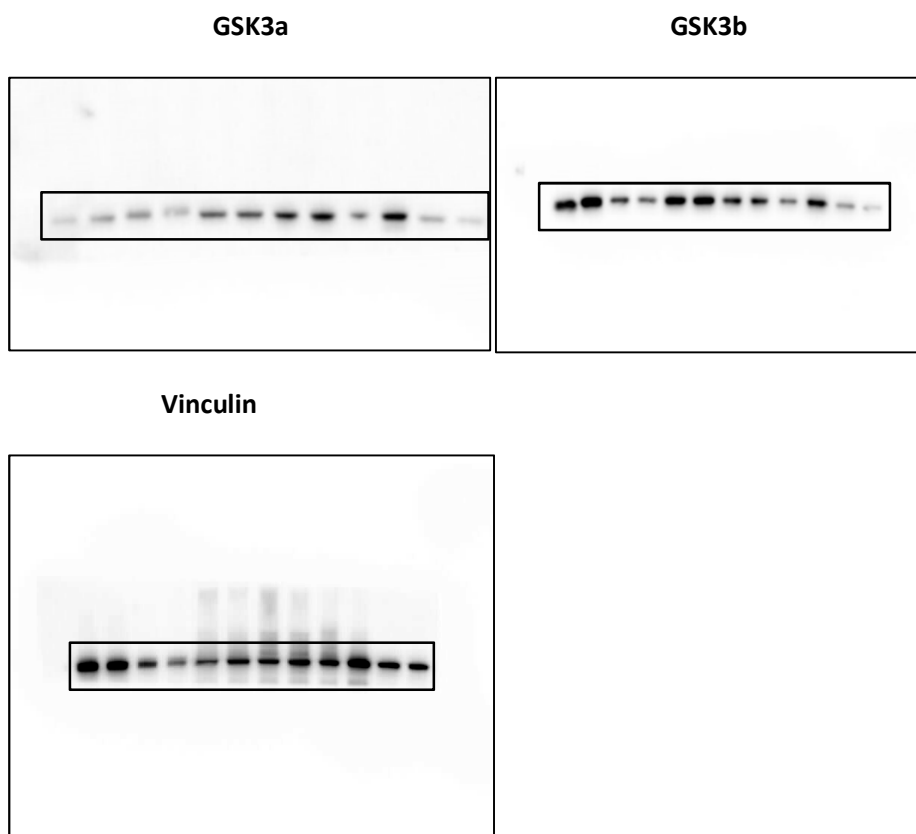

Fig. 4b:

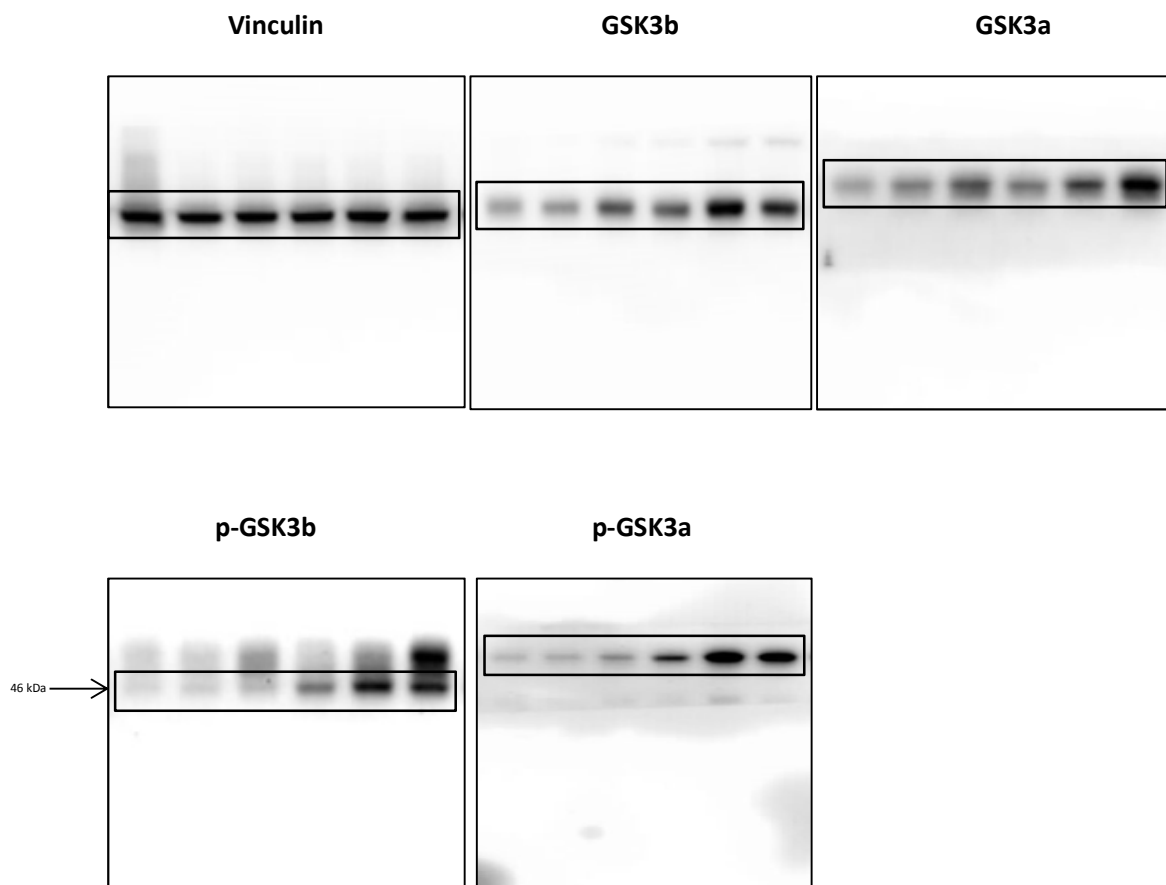

Fig. 4c:

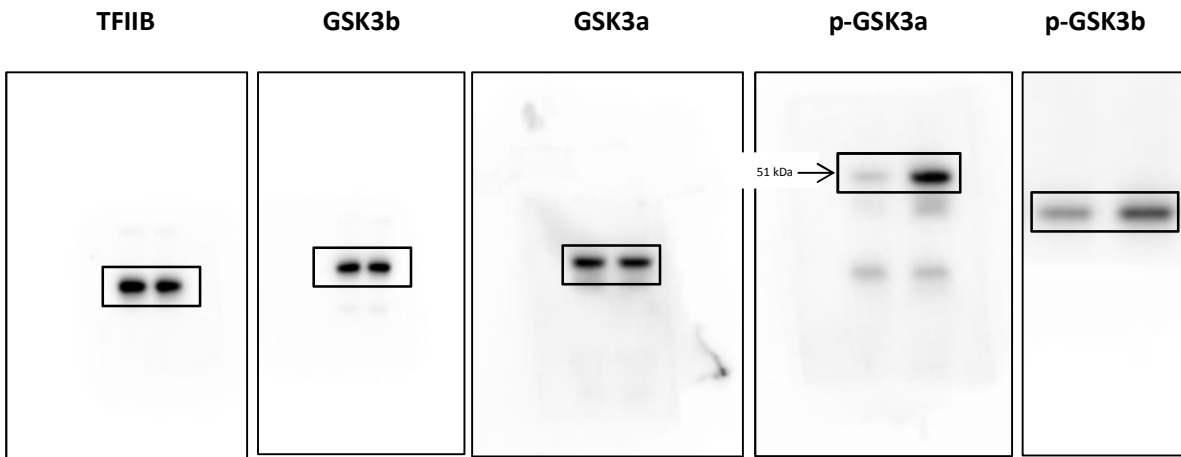

Fig. 5b:

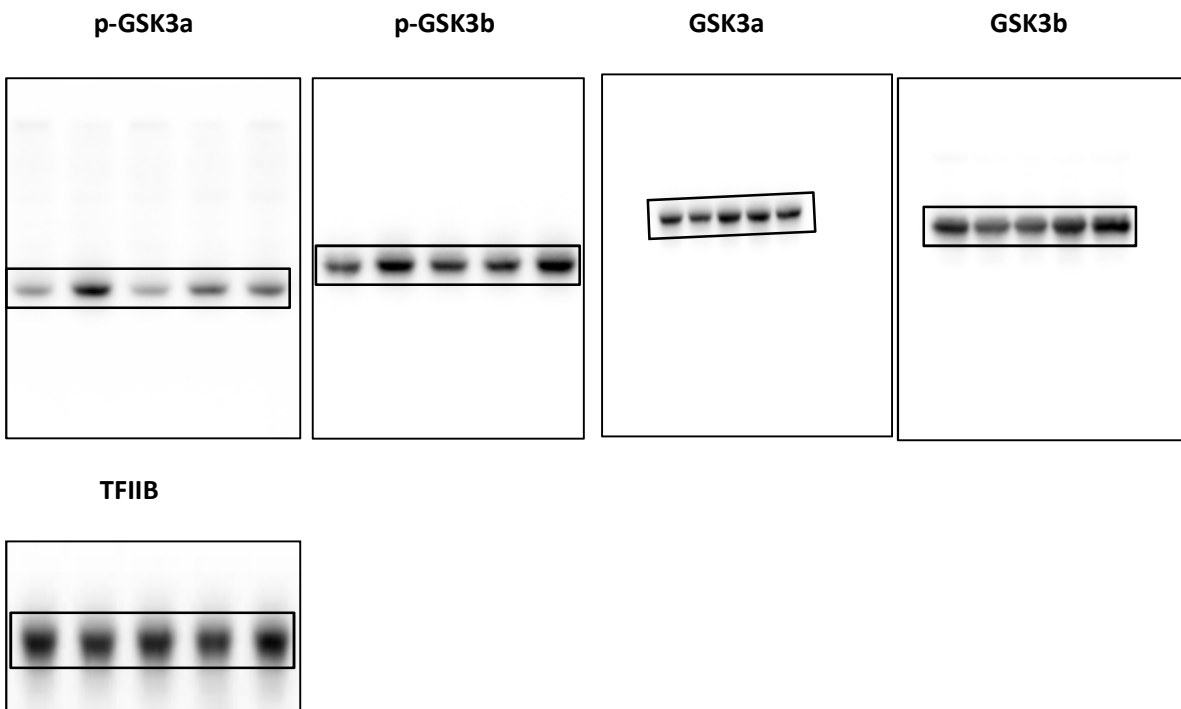

Fig. 5c:

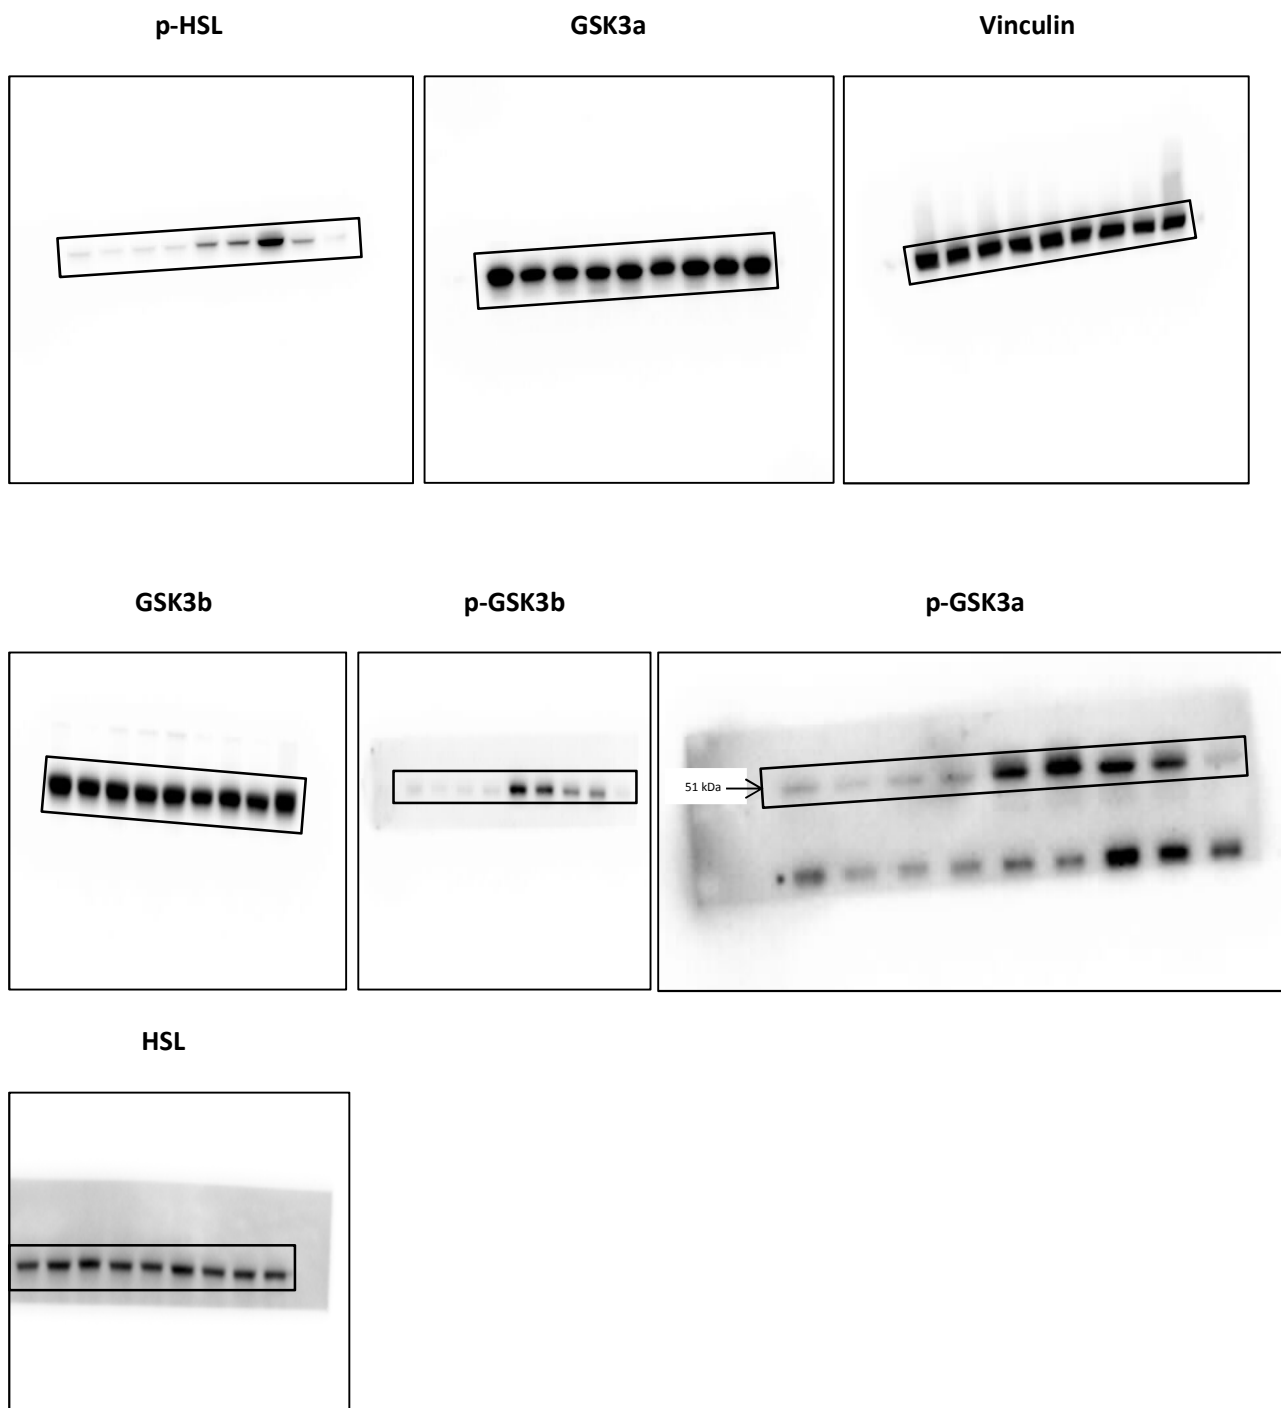

Fig. 5e:

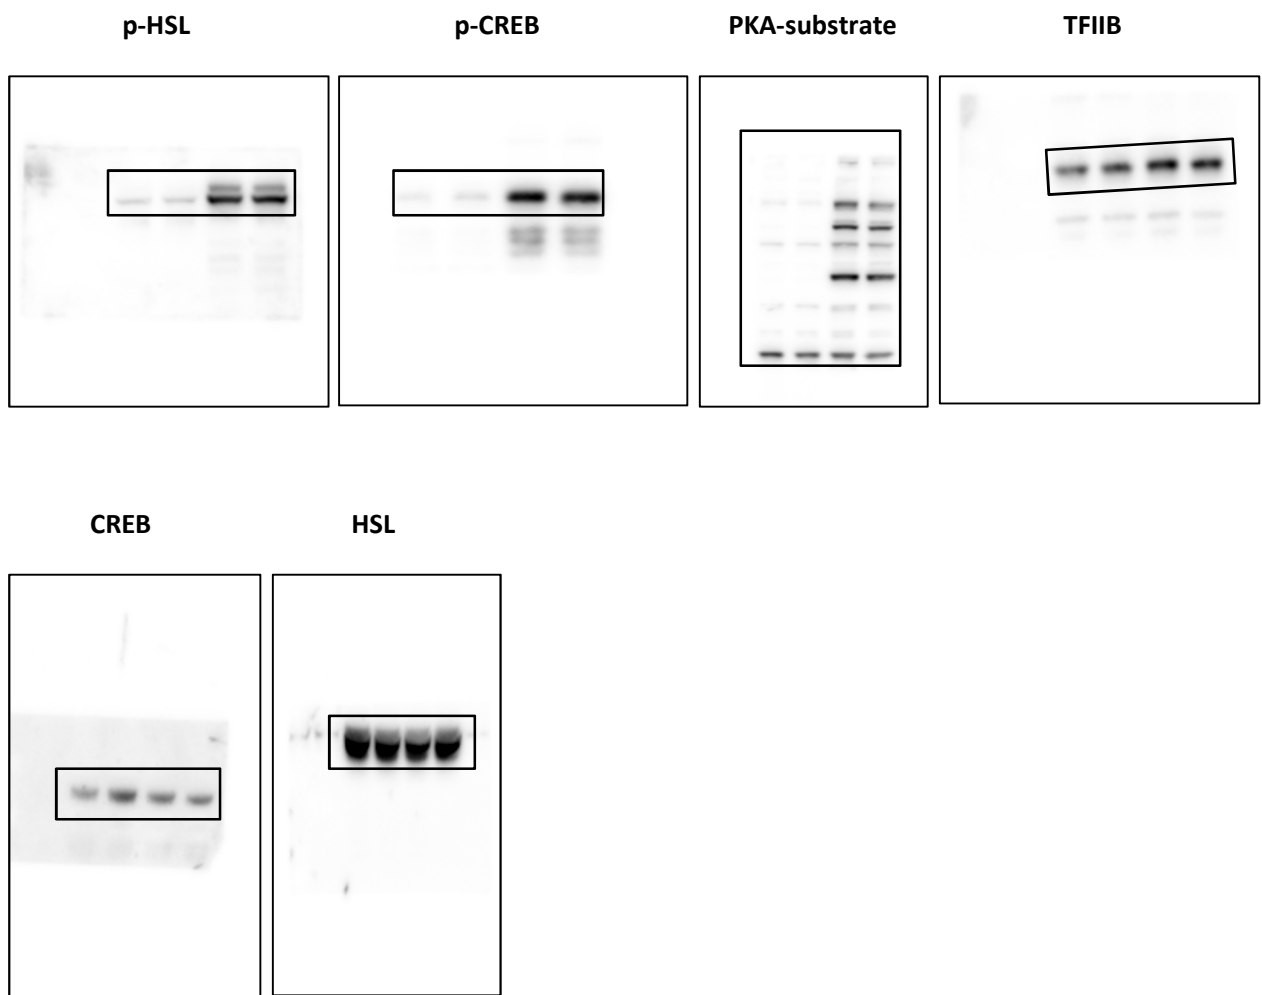



Fig. 6a:

p-ATF2

Above = p-MKK3/6

Below = TFIIIB

P-p38

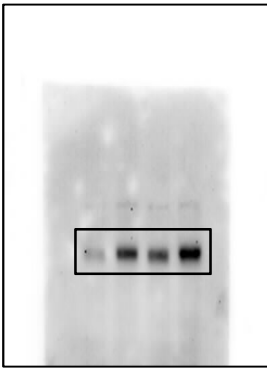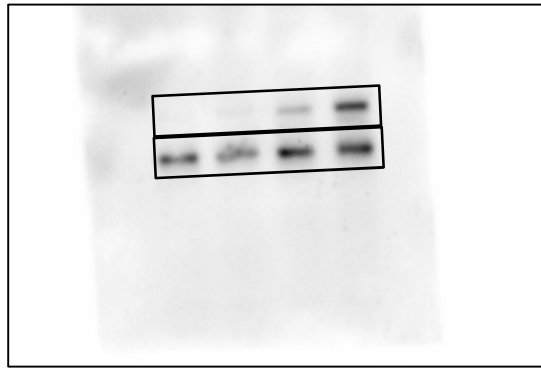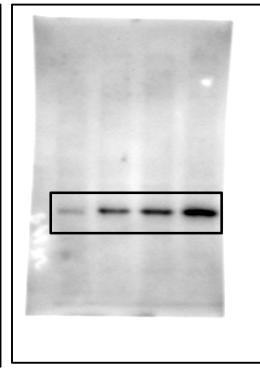

P38

p-AKT

AKT

MKK6

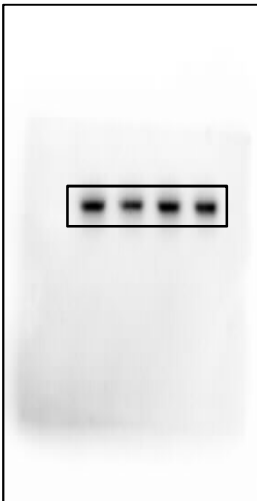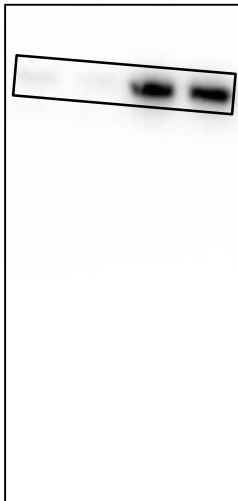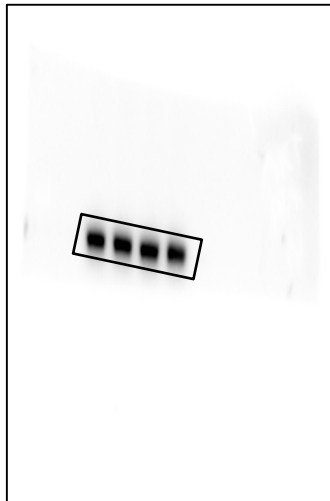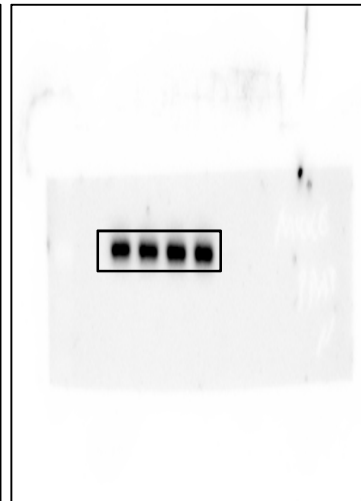

**MKK3**

**ATF2**

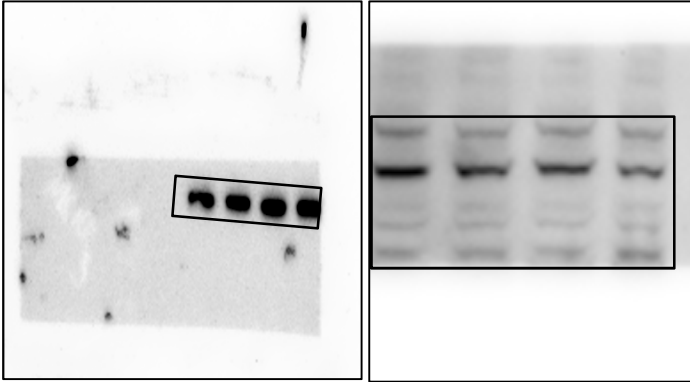

**Fig. 6b:**

**p-p38**

**p38**

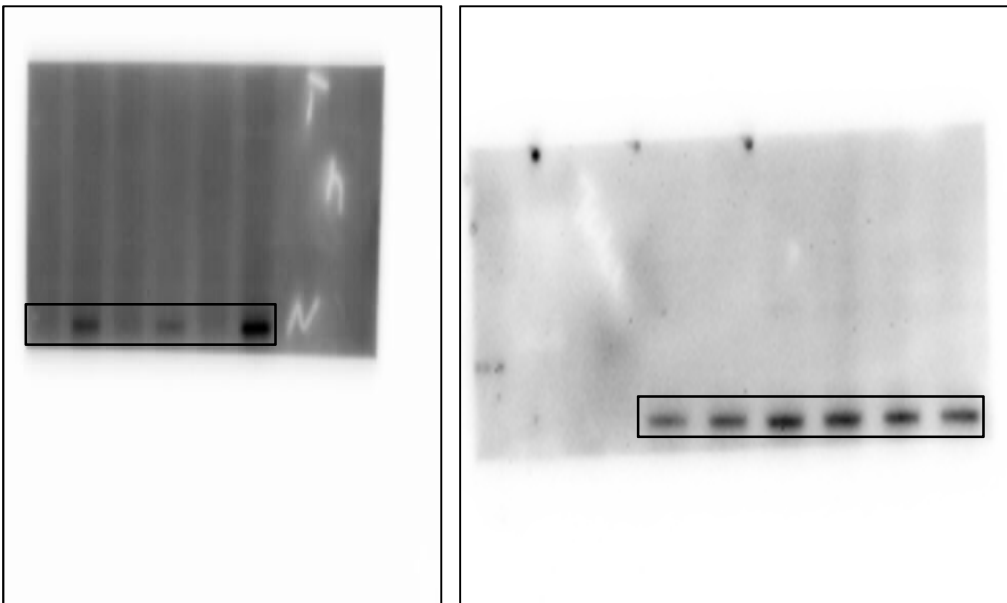

Supplementary Table 1

| No. | Inhibitor                        | Primary target         |
|-----|----------------------------------|------------------------|
| 1   | (DMSO)                           | (Unstimulated control) |
| 2   | K252a                            | Broad spectrum         |
| 3   | Ro 31-8220 mesylate              | Broad spectrum         |
| 4   | ER 27319 maleate                 | SYK                    |
| 5   | Olomoucine                       | cdk                    |
| 6   | PD 407824                        | Chk1                   |
| 7   | Ryuvidine                        | cdk                    |
| 8   | IMD 0354                         | IKK                    |
| 9   | GF 109203X                       | PKC                    |
| 10  | SB 218078                        | Chk1                   |
| 11  | Ki 8751                          | VEGFR                  |
| 12  | H 89 dihydrochloride             | PKA                    |
| 13  | API-2                            | PKB                    |
| 14  | LFM-A13                          | BTk                    |
| 15  | SB 239063                        | p38                    |
| 16  | SB 202190                        | p38                    |
| 17  | Dorsomorphin dihydrochloride     | AMPK                   |
| 18  | Aminopurvalanol A                | cdk                    |
| 19  | ZM 336372                        | Raf                    |
| 20  | ZM 449829                        | JAK3                   |
| 21  | SB 203580 hydrochloride          | p38                    |
| 22  | Fasudil hydrochloride            | ROCK                   |
| 23  | (-)-Terreic acid                 | BTk                    |
| 24  | 10-DEBC hydrochloride            | PKB                    |
| 25  | PI 828                           | PI3K                   |
| 26  | NSC 693868                       | cdk                    |
| 27  | Y-27632 dihydrochloride          | ROCK                   |
| 28  | GW 583340 dihydrochloride        | EGFR                   |
| 29  | PD 198306                        | MEK                    |
| 30  | PHA 665752                       | cMET                   |
| 31  | Ro 08-2750                       | TrkA                   |
| 32  | EO 1428                          | p38                    |
| 33  | PP 1                             | Src                    |
| 34  | GW 441756                        | TrkA                   |
| 35  | Rapamycin                        | mTOR                   |
| 36  | AG 490                           | EGFR                   |
| 37  | TBB                              | CK2                    |
| 38  | BI 78D3                          | JNK                    |
| 39  | ZM 447439                        | Aurora                 |
| 40  | BIO                              | GSK-3                  |
| 41  | GW 5074                          | Raf                    |
| 42  | CGK 733                          | ATR/ATM                |
| 43  | Iressa                           | EGFR                   |
| 44  | ZM 39923 hydrochloride           | JAK3                   |
| 45  | SL 327                           | MEK                    |
| 46  | KU 55933                         | ATM                    |
| 47  | TCS 359                          | FLT3                   |
| 48  | SU 4312                          | VEGFR                  |
| 49  | 1-Naphthyl PP1                   | Src                    |
| 50  | SU 5416                          | VEGFR                  |
| 51  | KH7                              | Adenylyl cyclase       |
| 52  | SC 514                           | IKK                    |
| 53  | ZM 323881 hydrochloride          | VEGFR                  |
| 54  | ML9 hydrochloride                | MLCK                   |
| 55  | GSK 650394                       | SGK                    |
| 56  | 1,2,3,4,5,6-Hexabromocyclohexane | JAK2                   |
| 57  | HA 1100 hydrochloride            | ROCK                   |
| 58  | Arcyriaflavin A                  | cdk                    |
| 59  | BIBX 1382 dihydrochloride        | EGFR                   |
| 60  | PD 98059                         | MEK                    |
| 61  | Purvalanol B                     | cdk                    |
| 62  | SD 208                           | TGFbR1                 |
| 63  | FPA 124                          | PKB                    |
| 64  | KT 5720                          | PKA                    |
| 65  | IKK 16                           | IKK                    |
| 66  | PQ 401                           | IGF-R1                 |
| 67  | D 4476                           | CK1                    |
| 68  | NU 7026                          | DNA-PK                 |
| 69  | KT 5823                          | PKG                    |
| 70  | LY 364947                        | TGFbR1                 |
| 71  | Compound 401                     | DNA-PK                 |
| 72  | GW 843682X                       | PIK                    |
| 73  | LY 294002 hydrochloride          | PI3K                   |
| 74  | PP 2                             | Src                    |
| 75  | Genistein                        | EGFR                   |
| 76  | CGP 57380                        | Mnk1                   |
| 77  | Purvalanol A                     | cdk                    |
| 78  | KN-62                            | CamKII                 |
| 79  | ZM 306416 hydrochloride          | VEGFR                  |
| 80  | CGP 53353                        | PKC                    |
| 81  | TPCA-1                           | IKK                    |
| 82  | SQ 22536                         | Adenylyl cyclase       |
| 83  | U0126                            | MEK                    |
| 84  | SB 216763                        | GSK-3                  |
| 85  | SP 600125                        | JNK                    |
| 86  | KU0063794                        | mTOR                   |
| 87  | SB 415286                        | GSK-3                  |
| 88  | Arctigenin                       | MEK                    |
| 89  | SB 431542                        | TGFbR1                 |
| 90  | NH 125                           | CamKIII                |
| 91  | STO-609 acetate                  | CaMKK/AMPK             |

## Supplementary Table 2

| <b>Fig. 2d</b> | GSK3 $\beta$ /TFIIB | HA/TFIIB |
|----------------|---------------------|----------|
| Vector         | 1.00                | ND       |
| CA             | 5.33                | 1.00     |
| KD             | 5.44                | 0.48     |

| <b>Fig. 3b</b>     | UCP1/TFIIB |
|--------------------|------------|
| Vehicle            | 1.00       |
| Vehicle + SB216763 | 1.00       |
| ISO                | 2.78       |
| ISO + SB216763     | 4.78       |

| <b>Fig. 3c</b>   | GSK3 $\alpha$ /TFIIB | GSK3 $\beta$ /TFIIB |
|------------------|----------------------|---------------------|
| Vehicle          | 1.00                 | 1.00                |
| Vehicle + siGSK3 | 0.32                 | 0.33                |
| ISO              | 1.04                 | 1.40                |
| ISO + siGSK3     | 0.33                 | 0.34                |

| <b>Fig. 4a</b> | GSK3 $\alpha$ /Vinculin | GSK3 $\beta$ /Vinculin |
|----------------|-------------------------|------------------------|
| Heart          | 0.44                    | 1.41                   |
| SKM            | 2.72                    | 3.75                   |
| iBAT           | 1.61                    | 2.12                   |
| iWAT           | 1.39                    | 0.91                   |
| eWAT           | 0.86                    | 0.96                   |
| Liver          | 0.49                    | 0.47                   |

| <b>Fig. 4b</b> | p-GSK3 $\alpha$ /GSK3 $\alpha$ | p-GSK3 $\beta$ /GSK3 $\beta$ |
|----------------|--------------------------------|------------------------------|
| RT             | 1.00                           | 1.00                         |
| Cold           | 3.95                           | 2.72                         |

| <b>Fig. 4c</b> | p-GSK3 $\alpha$ /GSK3 $\alpha$ | p-GSK3 $\beta$ /GSK3 $\beta$ |
|----------------|--------------------------------|------------------------------|
| Vehicle        | 1.00                           | 1.00                         |
| ISO            | 7.43                           | 2.52                         |

| <b>Fig. 5b</b> | p-GSK3 $\alpha$ /GSK3 $\alpha$ | p-GSK3 $\beta$ /GSK3 $\beta$ |
|----------------|--------------------------------|------------------------------|
| Vehicle        | 1.00                           | 1.00                         |
| ISO            | 2.55                           | 1.92                         |
| H89            | 0.69                           | 1.29                         |
| ISO + H89      | 1.20                           | 1.15                         |
| 6-MB           | 1.31                           | 1.56                         |

| <b>Fig. 5c</b> | p-HSL/HSL | p-GSK3 $\alpha$ /GSK3 $\alpha$ | p-GSK3 $\beta$ /GSK3 $\beta$ |
|----------------|-----------|--------------------------------|------------------------------|
| Wild-type      | 1.00      | 1.00                           | 1.00                         |
| AdipoQ-caPKA   | 16.69     | 3.07                           | 3.19                         |

| <b>Fig. 5e</b> | p-HSL/HSL | p-CREB/CREB |
|----------------|-----------|-------------|
| Vehicle        | 1.00      | 1.00        |
| SB216763       | 1.68      | 0.81        |
| ISO            | 13.13     | 13.62       |
| ISO + SB216763 | 11.60     | 16.23       |

| <b>Fig. 6a</b>    | p-AKT/<br>AKT | p-MKK3/6 /<br>MKK6 | p-p38/<br>p38 | p-ATF2/<br>ATF2 |
|-------------------|---------------|--------------------|---------------|-----------------|
| Vehicle           | 1.00          | ND                 | 1.00          | 1.00            |
| SB216763          | 0.95          | ND                 | 1.90          | 5.17            |
| ISO               | 16.38         | 1.00               | 3.41          | 6.42            |
| ISO +<br>SB216763 | 17.52         | 2.22               | 7.29          | 23.90           |

| <b>Fig. 6b</b> | p-p38/p38 |
|----------------|-----------|
| Vector         | 1.00      |
| Vector + ISO   | 7.57      |
| CA             | 1.27      |
| CA + ISO       | 1.65      |
| KD             | 0.08      |
| KD + ISO       | 28.26     |
